# Supplementary figures and images for: Light-stimulated growth of proteorhodopsin-bearing sea-ice psychrophile Psychroflexus torquis is salinity dependent
Source: PubMed Central journal article supplement — ISME J. 2013 Jun 20;7(11):2206–13. doi: 10.1038/ismej.2013.97 (PMC3806269; doi:10.1038/ismej.2013.97), 2013-06-20

# Supplementary Figure 1: Growth of *P. torquis* in 1:10, 1:100, 1:1000 and 1:10000 diluted marine broth.

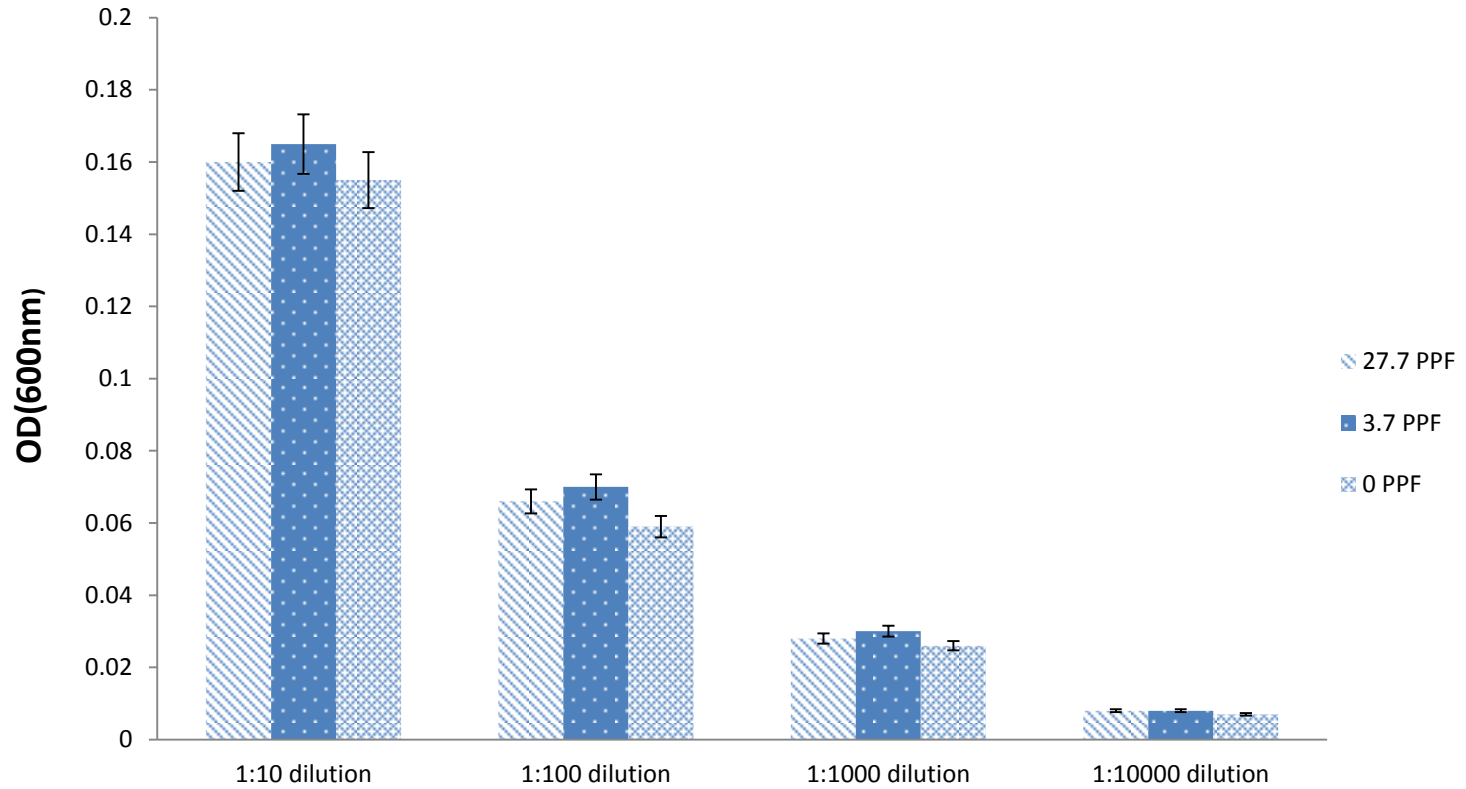

Supplement: ismej201397x1.pdf [file ismej201397x1.pdf]
